# Supplementary material for: Evaluation of quality consistency of Astragali radix by multi-dimensional profiles combined with chemometric analysis
Source: Royal Society of Chemistry journal article supplement (doi:10.1039/d4nj02668c), 2024-01-01
Supplement: d4nj02668c1.pdf [file d4nj02668c1.pdf]

Supplementary Information

Evaluation of quality consistency of Astragali Radix by multi-dimensional profiles combined with chemometric analysis

Mingjia Liu<sup>a</sup>, Ting Yang<sup>a\*</sup>, Guoxiang Sun<sup>a\*\*</sup>, Wanyang Sun<sup>b\*\*\*</sup>

<sup>a</sup> Shenyang Pharmaceutical University, Shenyang 110016, China

<sup>b</sup> Guangdong Engineering Research Center of Chinese Medicine & Disease Susceptibility, College of Pharmacy, Jinan University, Guangzhou 510632, China

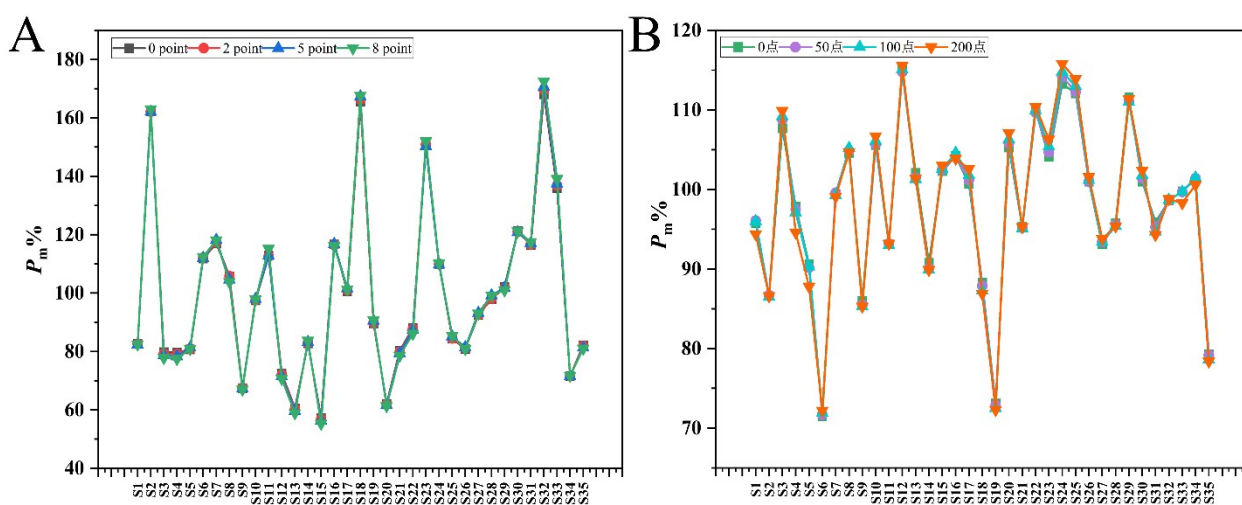

Fig. S1 Comparison of Pm values between FTIR(A), DSC (B) quantum fingerprints and original fingerprints

Table S1 Classification criteria for SQFM

| Para.      | Grade 1 | Grade 2 | Grade 3 | Grade 4 | Grade 5 | Grade 6 | Grade 7 | Grade 8 |
|------------|---------|---------|---------|---------|---------|---------|---------|---------|
| $S_m \geq$ | 0.95    | 0.9     | 0.85    | 0.8     | 0.7     | 0.6     | 0.5     | <0.50   |
| $P_m =$    | 95~105  | 90~110  | 85~115  | 80~120  | 70~130  | 60~140  | 50~150  | 0~∞     |

Table S2 Thermal behavior parameters in DSC curve.

| Para. | $\Delta H_1$ (J/g) | $\Delta H_2$ (J/g) | $\Delta H_3$ (J/g) | Total enthalpy change (J/g) |
|-------|--------------------|--------------------|--------------------|-----------------------------|
| S1    | 9.93               | 365.72             | 262.01             | 617.80                      |

|     |       |        |         |         |
|-----|-------|--------|---------|---------|
| S2  | 4.82  | 295.55 | 137.29  | 428.02  |
| S3  | 6.56  | 705.69 | 1784.36 | 2483.49 |
| S4  | 13.38 | 382.77 | 831.68  | 1201.07 |
| S5  | 9.92  | 531.05 | 123.06  | 644.19  |
| S6  | 13.20 | 436.26 | 361.14  | 784.20  |
| S7  | 28.09 | 493.61 | 758.78  | 1224.30 |
| S8  | 16.12 | 502.92 | 818.11  | 1304.91 |
| S9  | 16.49 | 285.70 | 27.13   | 296.34  |
| S10 | 16.46 | 722.18 | 671.41  | 1377.13 |
| S11 | 13.74 | 356.94 | 769.08  | 1112.28 |
| S12 | 9.67  | 465.53 | 1240.74 | 1696.60 |
| S13 | 8.46  | 421.11 | 1095.42 | 1508.07 |
| S14 | 7.78  | 431.89 | 604.81  | 1028.92 |
| S15 | 8.83  | 539.31 | 894.97  | 1425.45 |
| S16 | 23.99 | 620.48 | 801.59  | 1398.08 |
| S17 | 38.10 | 561.44 | 1350.14 | 1873.48 |
| S18 | 17.48 | 570.64 | 148.63  | 701.79  |
| S19 | 22.43 | 424.15 | 231.32  | 633.04  |
| S20 | 15.38 | 715.02 | 1102.60 | 1802.24 |
| S21 | 4.73  | 320.10 | 390.57  | 705.94  |
| S22 | 7.20  | 472.95 | 190.01  | 655.76  |
| S23 | 21.58 | 867.16 | 1139.08 | 1984.66 |
| S24 | 16.04 | 872.48 | 2544.95 | 3401.39 |
| S25 | 20.04 | 807.03 | 624.45  | 1411.44 |
| S26 | 20.02 | 539.65 | 269.51  | 789.14  |
| S27 | 14.96 | 454.94 | 587.37  | 1027.35 |
| S28 | 7.94  | 429.11 | 1157.72 | 1578.89 |
| S29 | 4.98  | 386.85 | 1200.92 | 1582.79 |
| S30 | 15.47 | 602.25 | 1013.03 | 1599.81 |

|     |       |        |         |         |
|-----|-------|--------|---------|---------|
| S31 | 18.81 | 552.13 | 406.64  | 939.96  |
| S32 | 3.28  | 375.74 | 940.34  | 1312.80 |
| S33 | 2.68  | 389.70 | 1215.47 | 1602.49 |
| S34 | 21.34 | 520.60 | 1412.21 | 1911.47 |
| S35 | 18.85 | 439.86 | 60.25   | 481.26  |

---
